# Supplementary material for: Toll-like receptor 3 as an immunotherapeutic target for KRAS mutated colorectal cancer
Source: PubMed Central journal article supplement (PMC5471041; doi:10.18632/oncotarget.16812), 2017-04-04
Supplement: oncotarget-08-35138-s001.pdf [file oncotarget-08-35138-s001.pdf]

## Toll-like receptor 3 as an immunotherapeutic target for *KRAS* mutated colorectal cancer

### SUPPLEMENTARY FIGURE AND TABLES

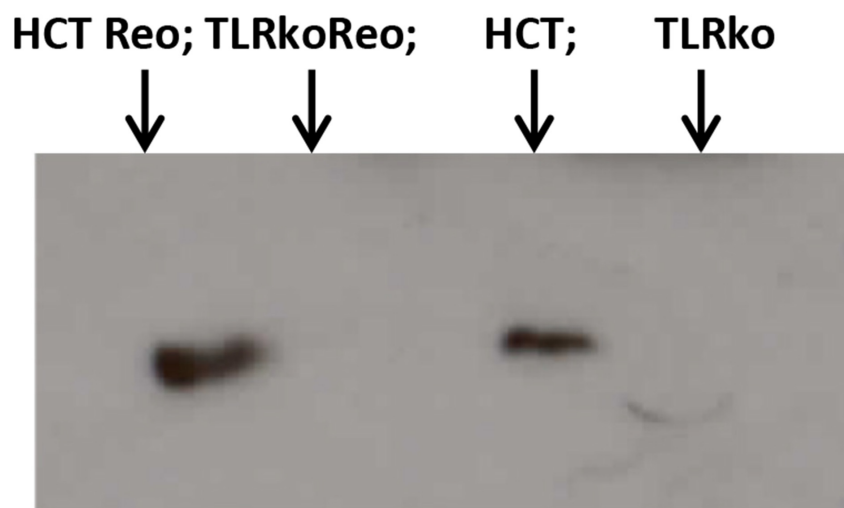

Supplementary Figure 1: The down regulation of TLR 3 was confirmed in both reovirus treated and untreated HCT116 and HKE3 cells by western blot analysis. 500 ugm protein was immunoprecipitated with TLR3 antibody.

**Supplementary Table 1: Tabular representation of the mean tumor weight in grams of rodents in each study group (n=4)**

|                     | Mean tumor wt<br>(in gm) | % reduction<br>in tumor wt | T test<br>TLR3 KO vs respective |
|---------------------|--------------------------|----------------------------|---------------------------------|
| HCT116 untreated    | 2.5633                   | 75.81                      | p = 0.000085                    |
| HCT 116 treated     | 0.62                     |                            |                                 |
| Plasmid A untreated | 1.6                      | 57.97                      | p = 0.000042                    |
| Plasmid A treated   | 0.6725                   |                            |                                 |
| TLR3 KO untreated   | 1.6975                   | 93.23                      |                                 |
| TLR3 KO treated     | 0.115                    |                            |                                 |

The percent growth inhibition between the untreated and reovirus treated mice within each group and the significance as determined by T TEST.

Supplementary Table 2: List of Primers used in the study for real time PCR

---

|                            |                                       |
|----------------------------|---------------------------------------|
| <b>hTRIF Forward</b>       | <b>5'-ACGCCATAGACCACTCAGCTTTCA-3'</b> |
| <b>hTRIF Reverse</b>       | <b>5'-AGGTTGCTCATCATGGCTTGGTTC-3'</b> |
| <b>hGAPDH Forward</b>      | <b>5'TTCGACAGTCAGCCGCATCTTCTT-3'</b>  |
| <b>hGAPDH Reverse</b>      | <b>5'-GCCCAATACGACCAAATCCGTTGA-3'</b> |
| <b>Reo LAMBDA3 Forward</b> | <b>5'TTTTGCAACAAACTGCGGGT 3'</b>      |
| <b>Reo LAMBDA3 Reverse</b> | <b>5' ACATGCCATAGCGTCACGAA3'</b>      |
| <b>hTLR3 Forward</b>       | <b># rtp-htlr3 Forward Invivogen</b>  |
| <b>hTLR3 Reverse</b>       | <b># rtp-htlr3 Reverse Invivogen</b>  |

---
